# Supplementary material for: Capturing RNA–protein interaction via CRUIS
Source: PubMed Central journal article supplement (PMC7229851; doi:10.1093/nar/gkaa143), 2020-03-06
Supplement: gkaa143_supplemental_file.pdf [file gkaa143_supplemental_file.pdf]

## **Capturing RNA-protein interaction via CRUIS**

Ziheng Zhang<sup>1,2,3,#</sup>, Weiping Sun<sup>1,2,3,#</sup>, Tiezhu Shi<sup>1,2,3,#</sup>, Pengfei Lu<sup>1,\*</sup>, Min Zhuang<sup>1,\*</sup> & Ji-Long Liu<sup>1,\*</sup>

### **SUPPLEMENTARY INFORMATION**

**Supplementary figures S1-S6**

**Supplementary tables S1-S3**

## Supplementary figures S1-S6

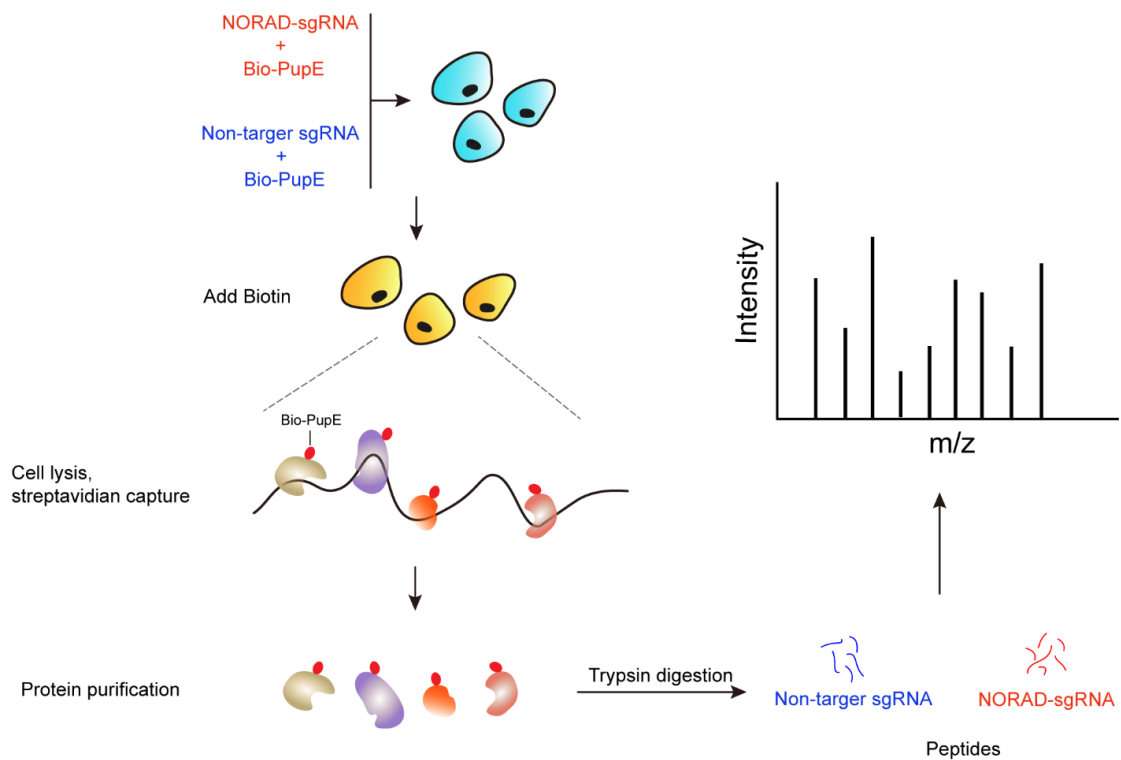

### Supplemental figures S1. A workflow of CRUIS to identify the RNA-protein interactions.

Cells were cultured in 150 mm dishes; 12 hours after transfection (sgRNA and pCMV-Bio-PupE) biotin was added to make the final conc. 20  $\mu$ M; 24 hours after addition of biotin the cells were collected and lysed. Streptavidin-beads were used for enriching and purifying proteins labeled with Bio-PupE. Finally, the type and abundance of proteins were identified by protein mass spectrometry after digestion by trypsin.

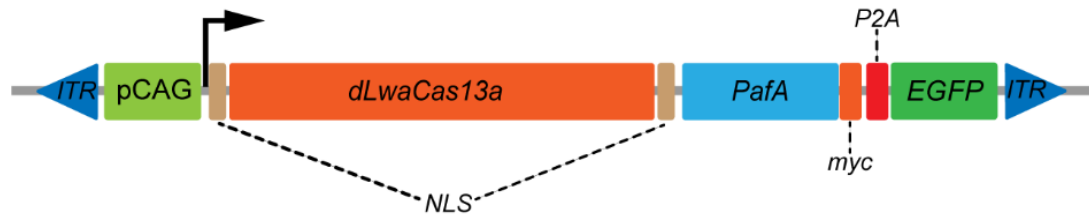

**Supplemental figures S2. A diagram of the CRUIS plasmid.**

*NLS*, nuclear localization sequence; pCAG, CAG promoter; *myc*, *myc* epitope tag; P2A, P2A self-cleaving peptide; EGFP, enhanced green fluorescent protein; ITRs, inverted terminal repeats. Thus, the fusion gene is currently too large for viral transduction. We obtained cell lines with stable expression of CRUIS using the piggyBac transposon system. Although the transfection efficiency was low, the GFP-positive cells were enriched by sorting. Single colonies were picked, expanded and tested.

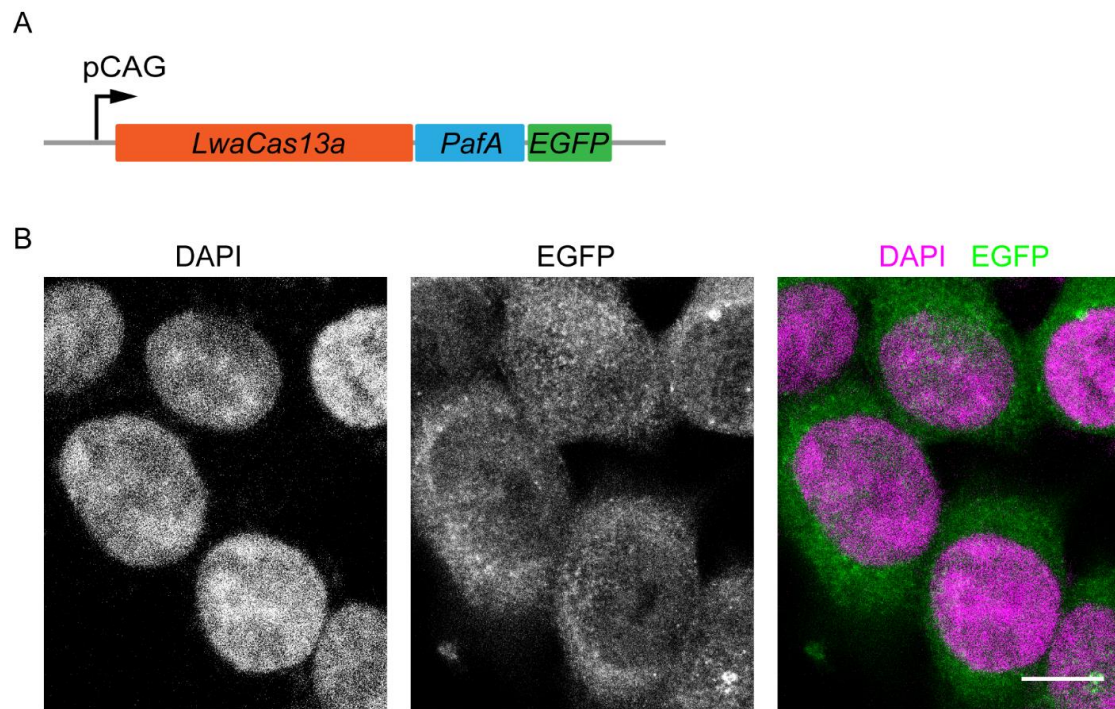

**Supplemental figures S3. Subcellular localization of CRUIS.**

(A) Schematic diagram of the plasmid structure used in this assay, EGFP was used to label CRUIS in the C-terminus (no *P2A* between *CRUIS* and *EGFP* in the construct). (B) After transfected *pCAG-CRUIS-EGFP* for 24h, the location of CRUIS was determined by EGFP. The results showed distribution in the nucleus and cytoplasm (scale bar 10  $\mu$ m).

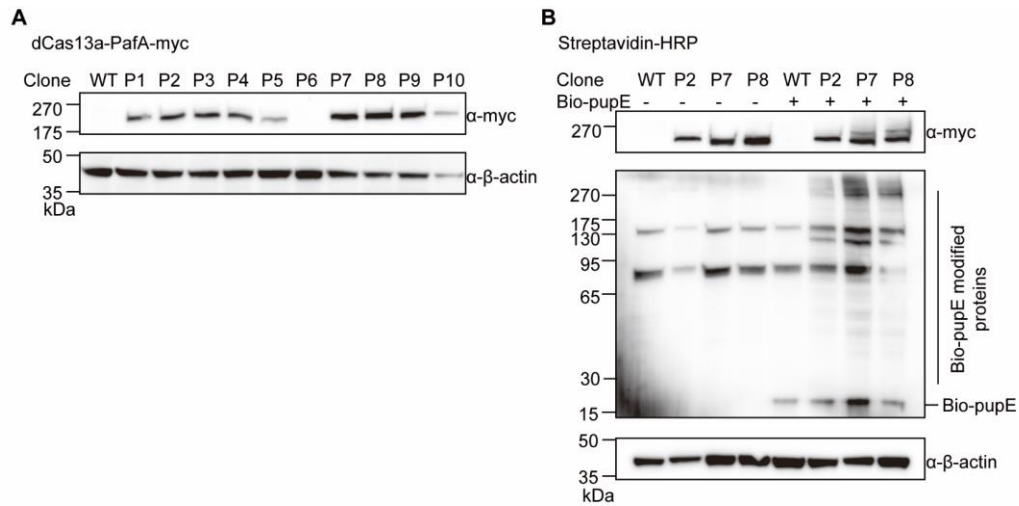

**Supplemental figures S4. Selection of CRUIS stable cell lines.**

(A) Anti-myc western blotting shows 10 clones with stable expression of CRUIS. (B) Three CRUIS stable cell lines, P2, P7, and P8, were selected to test the enzyme activity of PafA in CRUIS. Anti-streptavidin western blotting indicates that CRUIS shows reliable proximity targeting activity.

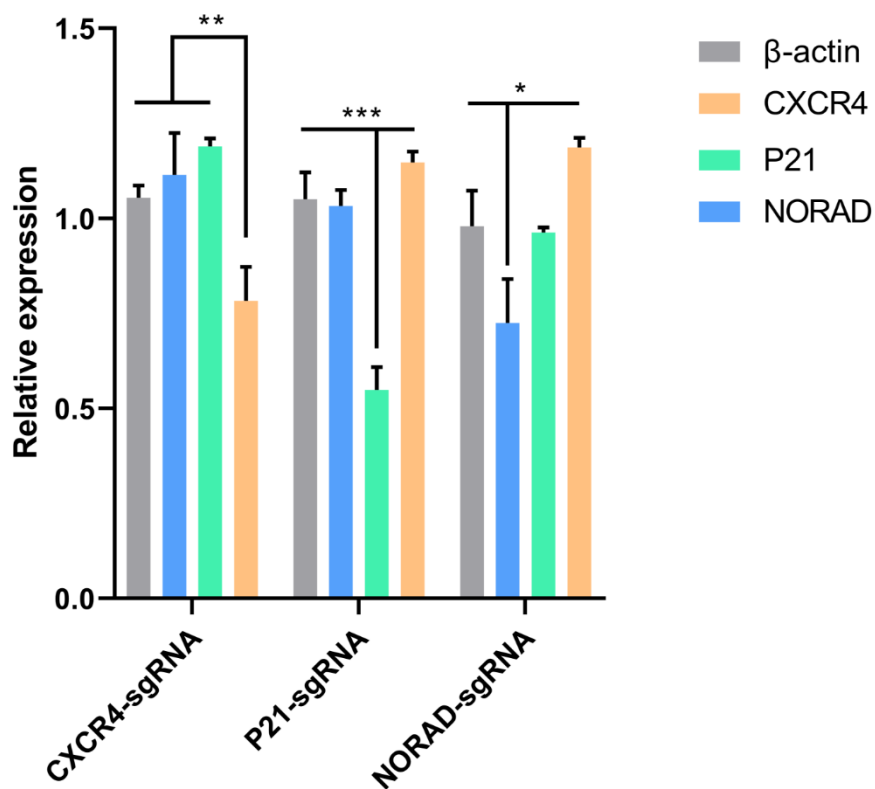

**Supplemental figures S5. Expression levels of RNAs.** HEK239T cells are co-transfected with LwaCas13a-PafA and sgRNA expression plasmid to detect the mRNA expression level of the target gene after 24 hours. The resulting values were normalized to GAPDH expressions. (n=3, mean  $\pm$  S.E.M \*\*\* P < 0.001; \*\* P < 0.01; \* P < 0.05).

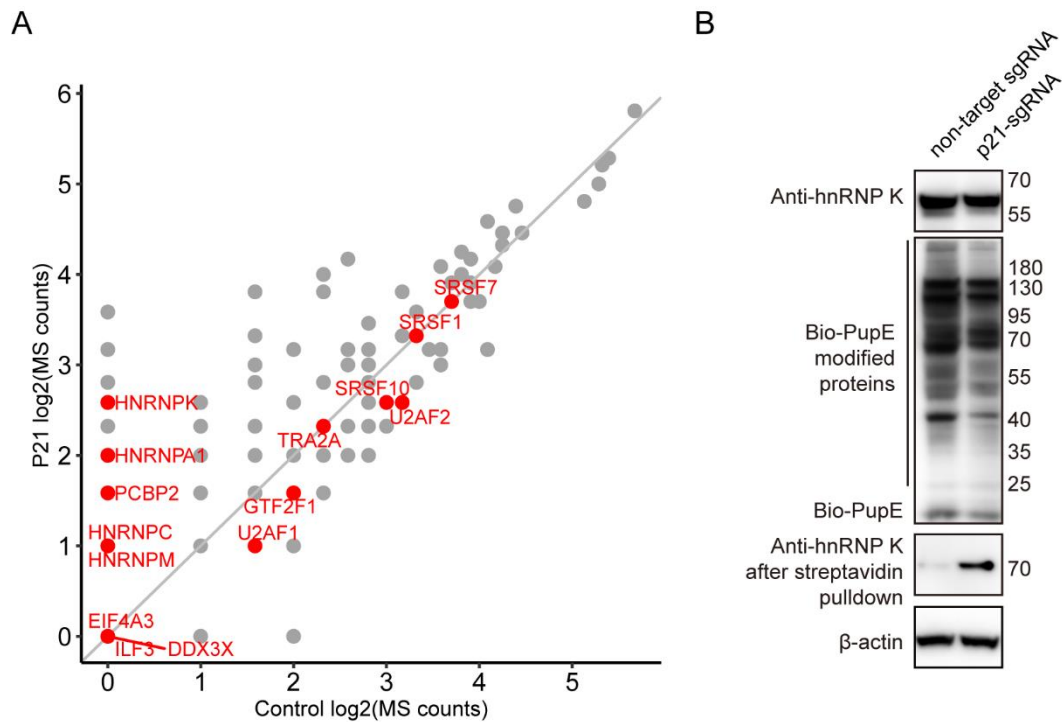

**Supplemental figures S6. Obtaining the RNA-binding proteins of P21 mRNA by CRUIS.**

(A) RNA-binding proteins of *P21* mRNA were captured by CRUIS. Some proteins were enriched in the P21 group (p21-target sgRNA) compared with control (non-target sgRNA). Some of these were *p21*-binding proteins identified previously (marked in red)(17). The red dots in the scatterplot are examples of known P21 RNA-binding proteins in StarBase v2.0 database. (B) Western blot showed CRUIS-mediated Bio-PupE modification of HNRNPK. After capturing the RBPs of *p21* mRNA by CRUIS, the labeled proteins were enriched using streptavidin magnetic beads, and HNRNPK was detected by HNRNPK-specific antibody. Compared to the non-target sgRNA group, the p21-target group showed highly enriched of HNRNPK.

**Supplementary Table S1. Amino acid sequence of dLwaCas13a-PafA-P2A-EGFP fusion protein.**

| Name                     | Amino acid sequence                                                                                                                                                                                                                                                                                                                                                                                                                                                                                                                                                                                                                                                                                                                                                                                                                                                                                                                                                                                                                                                                                                                                                                                                                                                                                                                                                                                                                                                                                                                                                                                                                                                                                                                                                                                                                                                                                                                                                                                                                                                                                                         |
|--------------------------|-----------------------------------------------------------------------------------------------------------------------------------------------------------------------------------------------------------------------------------------------------------------------------------------------------------------------------------------------------------------------------------------------------------------------------------------------------------------------------------------------------------------------------------------------------------------------------------------------------------------------------------------------------------------------------------------------------------------------------------------------------------------------------------------------------------------------------------------------------------------------------------------------------------------------------------------------------------------------------------------------------------------------------------------------------------------------------------------------------------------------------------------------------------------------------------------------------------------------------------------------------------------------------------------------------------------------------------------------------------------------------------------------------------------------------------------------------------------------------------------------------------------------------------------------------------------------------------------------------------------------------------------------------------------------------------------------------------------------------------------------------------------------------------------------------------------------------------------------------------------------------------------------------------------------------------------------------------------------------------------------------------------------------------------------------------------------------------------------------------------------------|
| dLwaCas13a-PafA-P2A-EGFP | MPKKKRKVGRCRISLRYRGPGIATMKVTKVDGISHKKYIEEGKLVKSTSEENRT<br>SERLSELLSIRLDIYIKNPDNASEEENRIRRENLKKFFSNKVLHLKDSVLYLKNRKEK<br>NAVQDKNYSEEDISEYDLKNKNSFSVLKILLNEDVNSEELEIFRKDVEAKLNKINSL<br>KYSFEENKANYQKINENNVEKVGGKSKRNIIYDYYRESAKRNDYINNVEAFDKLY<br>KKEDIEKLFFLIENSKKHEKYKIREYYHKIIGRKNNDKENFAKIIYEEIQNVNNIKELIEKI<br>PDMSELKKSQVFYKYLDKEELNDKNIKYAFCHFVEIEMSQLLKNYVYKRLSNISN<br>DKIKRIFEYQNLKLIENKLLNKLDTYVRNCGKYNYYLQVGEIATSDFIARNRQNEAF<br>LRNIIGVSSVAYFSLRNILETENENDITGRMRGKTVKNNKGEEKYVSGEVDKIYNEN<br>KQNEVKENLKMFSYDFNMDNKNEIEDFFANIDEAISSIAHGIVHFNLELEGKDIFAF<br>KNIAPSEISKMFQNEINEKLLKIFKQLNSANVFNYEYKDVIIKYLKNTKFNFNK<br>NIPFVPSFTKLYNKIEDLRNTLKFVSWPKDKEEKDAQIYLLKNIYYGEFLNKFVKNS<br>KVFFKITNEVIKINKQRNQKTGHYKYQKFENIEKTVPVEYLAIISREMINNQDKEEK<br>NTYIDFIQQIFLKGFDYLNKNNLKYIESNNNDNDNDFSKIKIKKDNKEKYDKILKNYE<br>KHNRNKEIPHEINEFVREIKLGKILKYTENLMFYLLKLLNHKELTNLKSLEKYQS<br>ANKEETFSDELELINLLNLDNNRVTEDFELEANEIGKFLDFNENKIKDRKELKKFDT<br>NKIYFDGENIHKRAFYNIKKYGMLNLEKIADKAKYKISLKEKEYSNKKNEIEKNT<br>MQQNLHRKYARPKKDEKFNDEYKEYEKAIGNIQKYTHLKNKVEFNELNLLQGLL<br>KILHRLVGYTSIWERDLRFRLKGEFPENHYEEIFNFDNSKNVYKSGQIVEKYINFY<br>KELYKDNVEKRSIYSDKKVKKLQEKKDLIANYIAHFNYIPHAEISLLEVLNLRKLL<br>SYDRKLNKAIMKSIVDILKEYGFVATFKIGADKKIEIQTLESEKIVHLKLNKLLKMTD<br>RNSEELCELVKVMFEYKALEQRPQGGGPKKKRKGSGMSTVESALTRRIMGI<br>ETEYGLTFVDGDSKLRPDEIARRMFRPIVEKYSSSNIFIPNGSRLYLDVGSHPYA<br>TAECNLTQLINFEKAGDVIADRMVDAEESLAKEDIAGQVYLFKNNVDSVGNISY<br>CHENYLVGRSMPLKALGKRLMPFLITRQLICGAGRIHHPNPLDKGESFPLGYCISQ<br>RSDHVWEGVSSATTRSRPIINTRDEPHADSHSYRRLHVIVGDANMAEPSIALKVG<br>TLLVLEMIEADFGPLSLELANDIASIREISRDATGSTLLSLKDGTMTALQIQVVF<br>HASKWLEQRPEPEFSGTSNTEMARVLDLWGRMLKAIESGDFSEVDTEIDWVIKKK<br>LIDRFIQRGNLGLDDPKLAQVDLTYHDIRPGRGLFVLSRGMIKRWTTDEAILAAV<br>DTAPDTTRAHLRGRILKAADTLGVPVTDWMRHKVNRPEPQSVELGDPFSAVNSE<br>VDQLIEYMTVHAESYRSEQLISEEDLGGATNFSLLKQAGDVEENPGPMVSKGE<br>ELFTGVVPILVELDGDVNGHKFSVSGEGEGDATYGKLTCLKFICTTGKLPVPWPTLV<br>TTLTYGVQCFSRYPDHMKQHDFFKSAMPEGYVQERTIFFKDDGNYKTRAEVKFE<br>GDTLVNRIELKGIDFKEDGNILGHKLEYNYNSHNVYIMADKQKNGIKVNFKIRHNIED<br>GSVQLADHYQQNTPIGDGPVLLPDNHYLSTQSALS KDPNEKRDHMLLEFVTAAG<br>ITLGMDELYK* |



**Supplementary Table S2. sgRNA information.**

| Name        | Guide sequence (5'-3')       | Figure                   |
|-------------|------------------------------|--------------------------|
| ACTB-sgRNA  | ctggcggcgggtgtggacgggcggcgga | Fig.1C                   |
| NORAD-sgRNA | tcggaacctcttccatctagaagggc   | Fig. 2A, Fig. 3A. Fig.S5 |
| CXCR4-sgRNA | atgataatgcaatagcaggacaggatga | Fig. 2A, Fig.S5          |
| P21-sgRNA   | tacactaagcacttcagtgcctccaggg | Fig. 2A, Fig. S5, Fig.S6 |

**Supplementary Table S3. Information on biological processes.**

| ID         | Description                                                                          |
|------------|--------------------------------------------------------------------------------------|
| GO:0006397 | mRNA processing                                                                      |
| GO:0008380 | RNA splicing                                                                         |
| GO:0000375 | RNA splicing, via transesterification reactions                                      |
| GO:0000377 | RNA splicing, via transesterification reactions with bulged adenosine as nucleophile |
| GO:0000398 | mRNA splicing, via spliceosome                                                       |
| GO:1903311 | regulation of mRNA metabolic process                                                 |
| GO:0006403 | RNA localization                                                                     |
| GO:0050657 | nucleic acid transport                                                               |
| GO:0050658 | RNA transport                                                                        |
| GO:0051236 | establishment of RNA localization                                                    |
| GO:0015931 | nucleobase-containing compound transport                                             |
| GO:0043484 | regulation of RNA splicing                                                           |
| GO:0050684 | regulation of mRNA processing                                                        |
| GO:0048024 | regulation of mRNA splicing, via spliceosome                                         |
| GO:1903312 | negative regulation of mRNA metabolic process                                        |
| GO:0031124 | mRNA 3'-end processing                                                               |
| GO:0031123 | RNA 3'-end processing                                                                |
| GO:0050685 | positive regulation of mRNA processing                                               |
| GO:1903313 | positive regulation of mRNA metabolic process                                        |
| GO:0033120 | positive regulation of RNA splicing                                                  |
| GO:0006614 | SRP-dependent cotranslational protein targeting to membrane                          |
| GO:0006613 | cotranslational protein targeting to membrane                                        |
| GO:0045047 | protein targeting to ER                                                              |
| GO:0072599 | establishment of protein localization to endoplasmic reticulum                       |
| GO:0000184 | nuclear-transcribed mRNA catabolic process, nonsense-mediated decay                  |
| GO:0070972 | protein localization to endoplasmic reticulum                                        |
| GO:0006612 | protein targeting to membrane                                                        |
| GO:0019083 | viral transcription                                                                  |
| GO:0006413 | translational initiation                                                             |
| GO:0019080 | viral gene expression                                                                |
| GO:0000956 | nuclear-transcribed mRNA catabolic process                                           |
| GO:0090150 | establishment of protein localization to membrane                                    |
| GO:0006402 | mRNA catabolic process                                                               |
| GO:0006401 | RNA catabolic process                                                                |
| GO:0072594 | establishment of protein localization to organelle                                   |
